# Supplementary material for: Posttraumatic Stress Disorder Is Associated with Increased Risk of Ovarian Cancer: A Prospective and Retrospective Longitudinal Cohort Study
Source: Oxford University Press journal article supplement (doi:10.1158/0008-5472.can-19-1222), 2019-09-05
Supplement: 00085472can191222-sup-220813_2_supp_5680122_pvgtx6.docx [file 00085472can191222-sup-220813_2_supp_5680122_pvgtx6.docx]

**eTable. Traumatic events and PTSD symptoms queried**

| **Traumatic events queried** | **PTSD symptoms queried** |
| --- | --- |
| Serious accident | Since the event have you: |
| Major natural or human made disaster | Avoided being reminded of the experience by staying away from people, places or activities? |
| Life-threatening illness | Lost interest in activities that were important or enjoyable? |
| Before age 18, beaten by a parent or caregiver | Felt more isolated or distant from other people? |
| Attacked, beaten or mugged | Found it hard to have love or affection for other people? |
| Made to have unwanted sexual contact | Found that there was no point in planning for the future? |
| Miscarriage or stillbirth | Had more trouble than usual sleeping? |
| Complications of pregnancy or birth | Become jumpy or got easily startled by ordinary noises? |
| Sexual harassment at work |  |
| Other serious injury or situation in which you feared serious injury |  |
| Sudden and violent death of close family member or friend |  |
| Outside of work as a nurse, witnessed someone seriously injured or killed |  |
| Served in a war zone |  |
| Treated civilians with traumatic injuries (e.g., burn victims) |  |
| Other seriously traumatic event not listed |  |
|  |  |
